# Supplementary material for: La participación comunitaria en la construcción de una sociedad intercultural: Posibilidades de acción social en los contextos educativos
Source: PLOS journal article supplement (doi:10.1371/journal.pone.0078637), 2005-01-01

**Figure S1. Fragmentation patterns of individual compounds in experiment 1.** Shown here are the compounds recorded from the mandibular gland extracts of the queens exposed to CO<sub>2</sub> and CO<sub>2</sub>+physical manipulation (fragmentation patterns are shown for one of the CO<sub>2</sub> queens).

**Compound 1 (8.50min): Unk1**

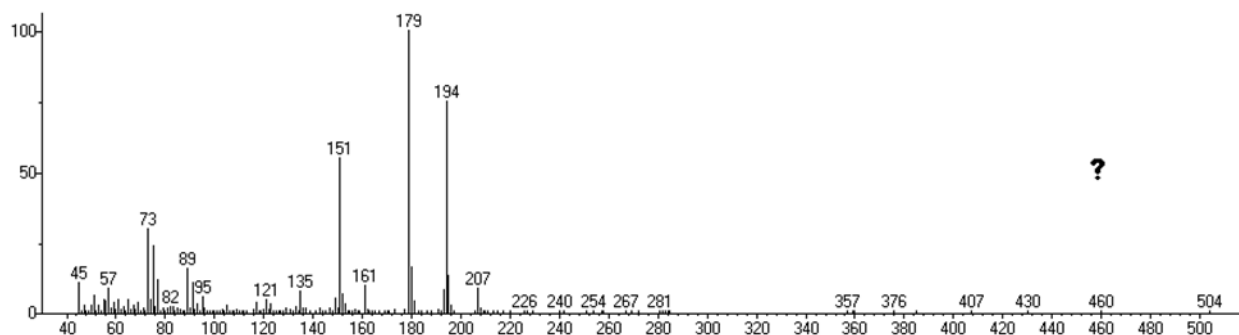

**Compound 2 (9.21min): Unk2**

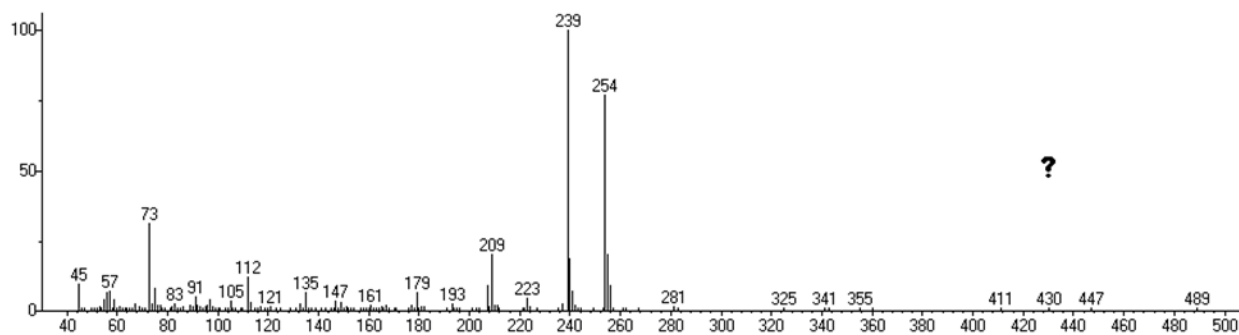

**Compound 3 (11.17min): HOB**

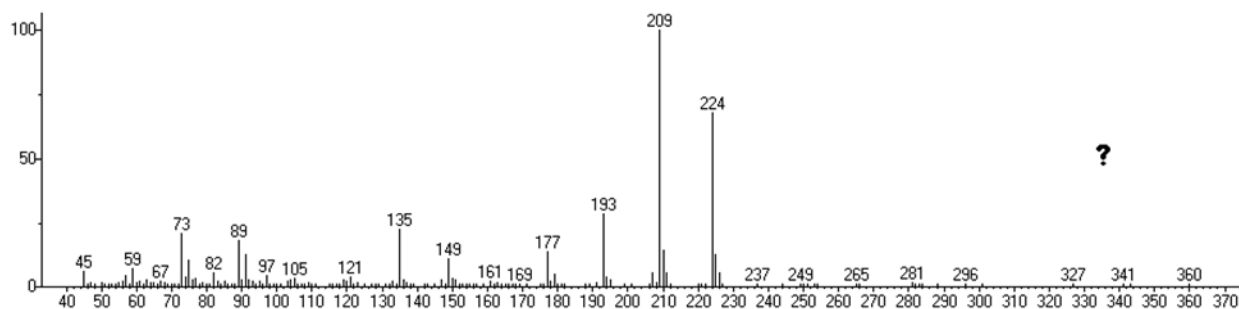

**Compound 4 (14.02min): 7OH-octanoic acid**

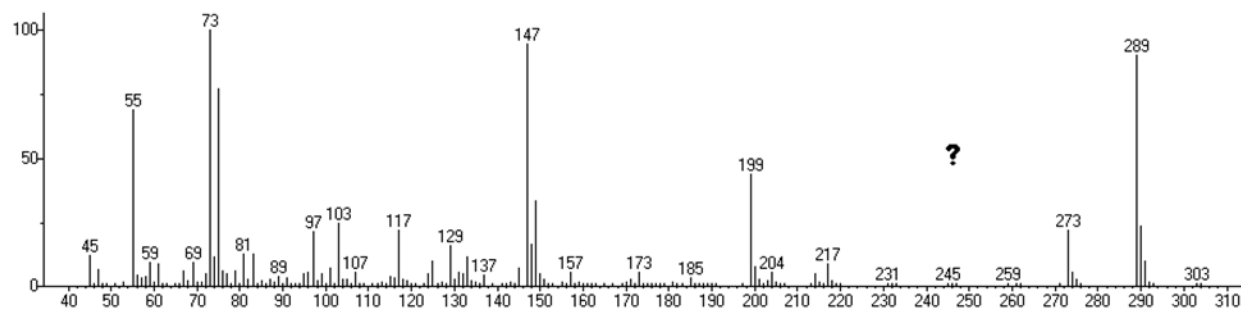

**Compound 5 (14.18min): Benzoic acid**

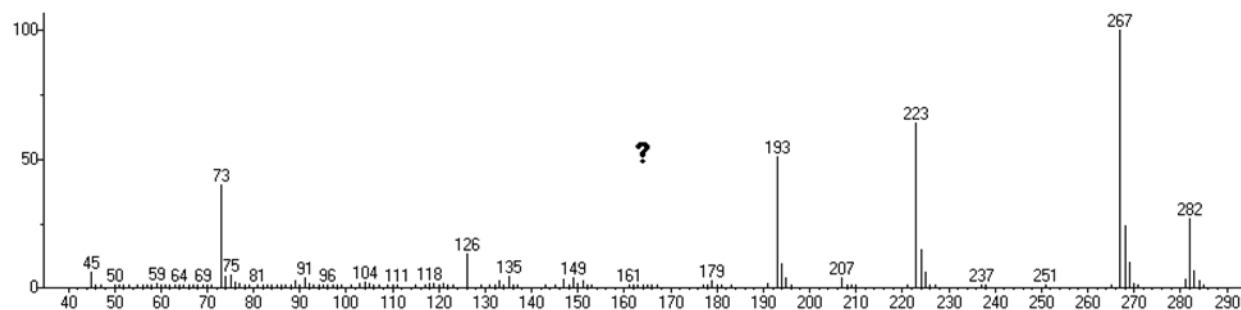

**Compound 6 (14.60min): Unk3**

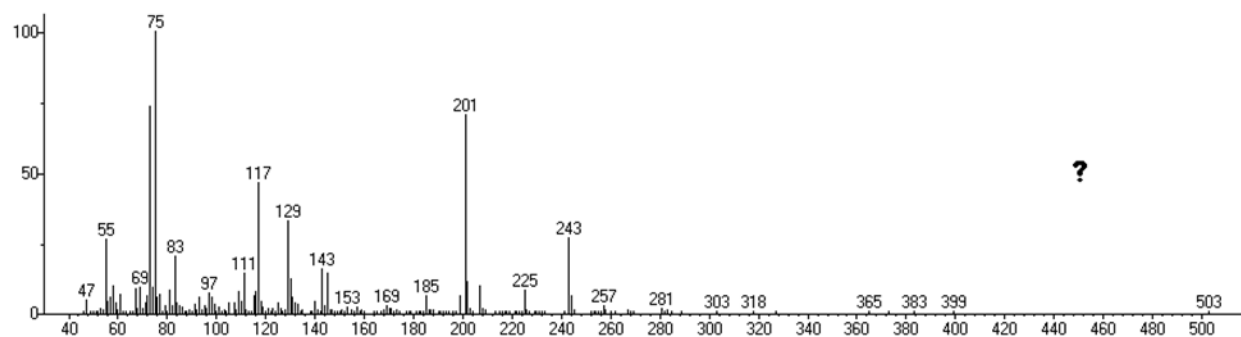

**Compound 7 (15.07min): Unk4**

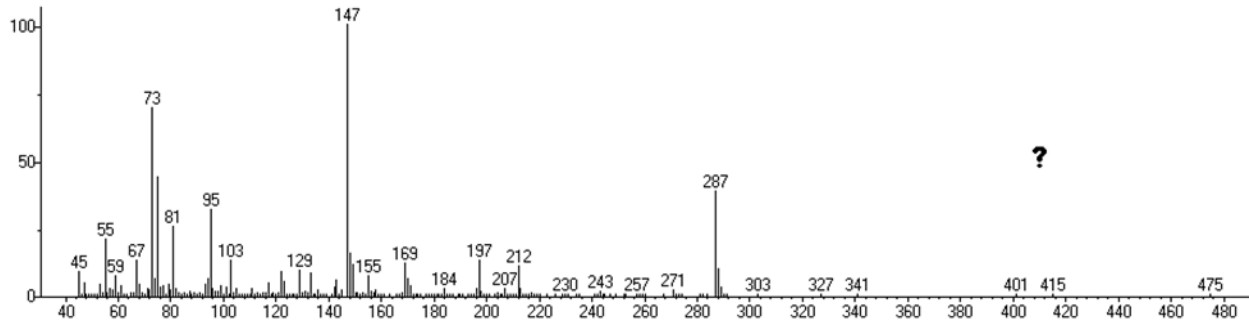

**Compound 8 (15.92min): 9-ODA**

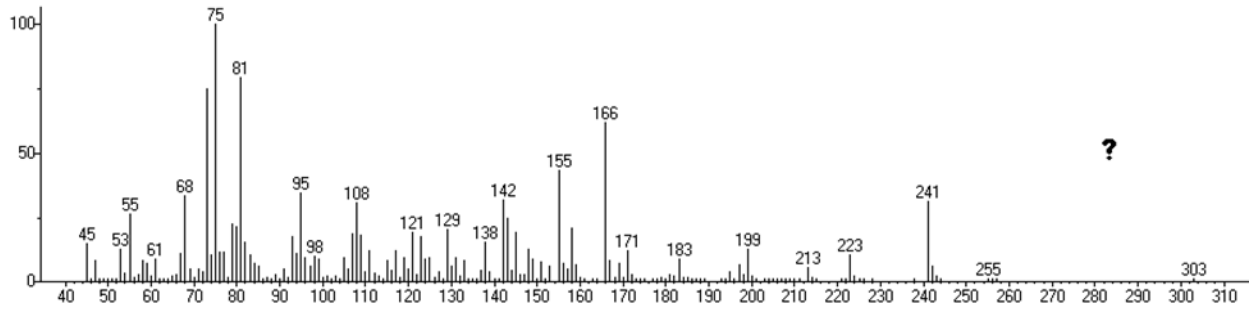

**Compound 9 (16.04min): HVA**

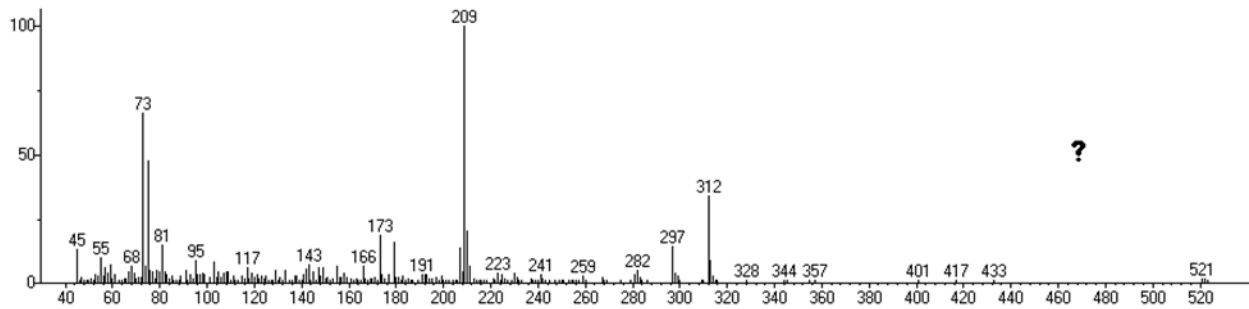

**Compound 10 (16.61min): 9-oxydecanoic acid**

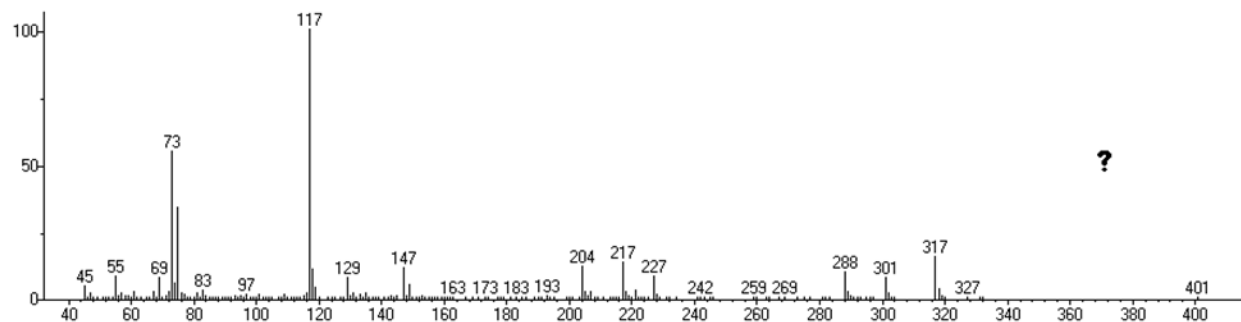

**Compound 11 (16.82min): Unk5**

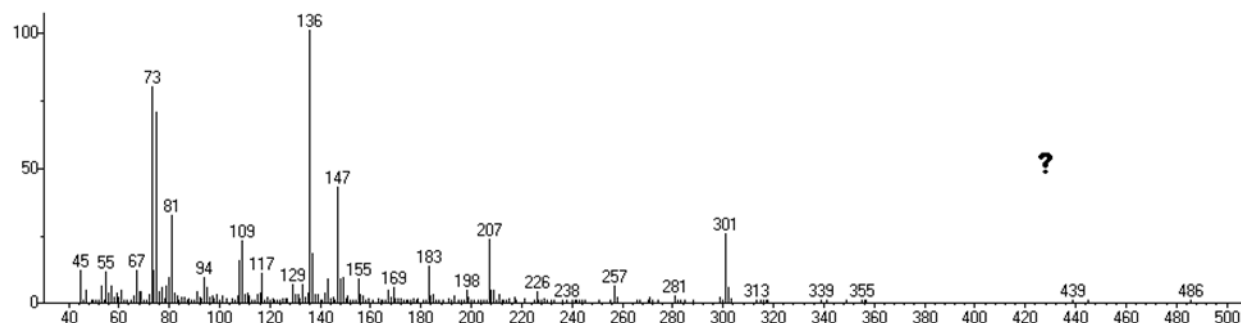

**Compound 12 (17.35min): Unk6**

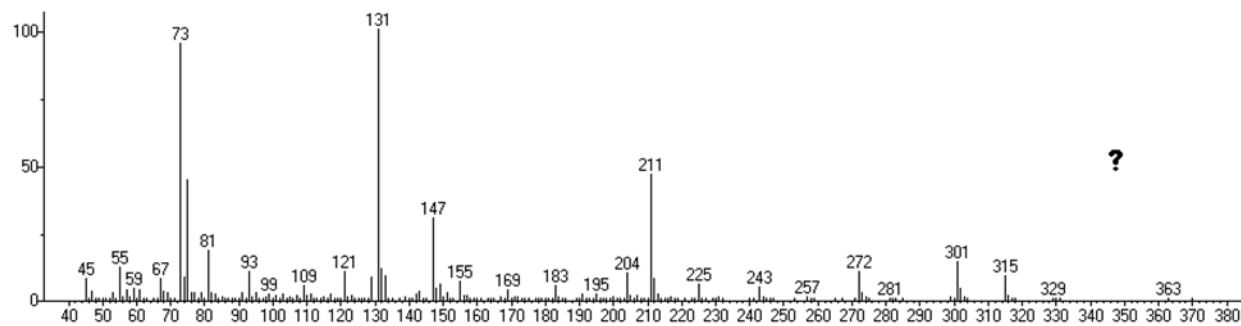

**Compound 13 (17.69min): 9-HDA**

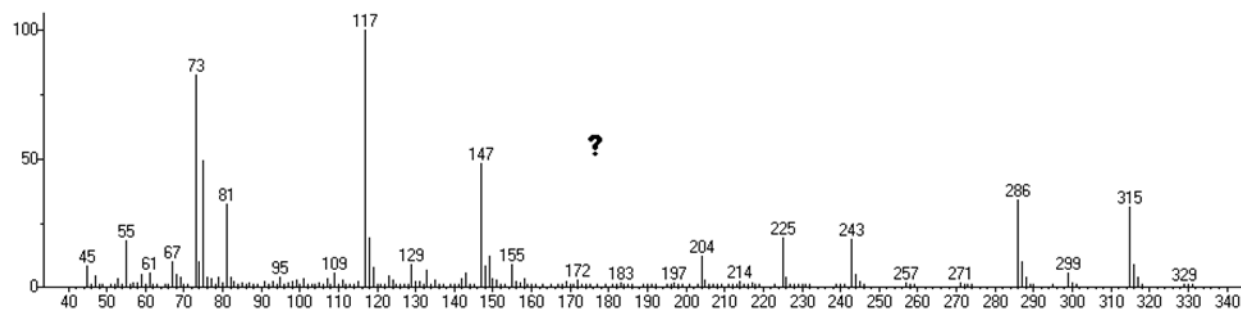

**Compound 14 (18.08min): 10HDAA**

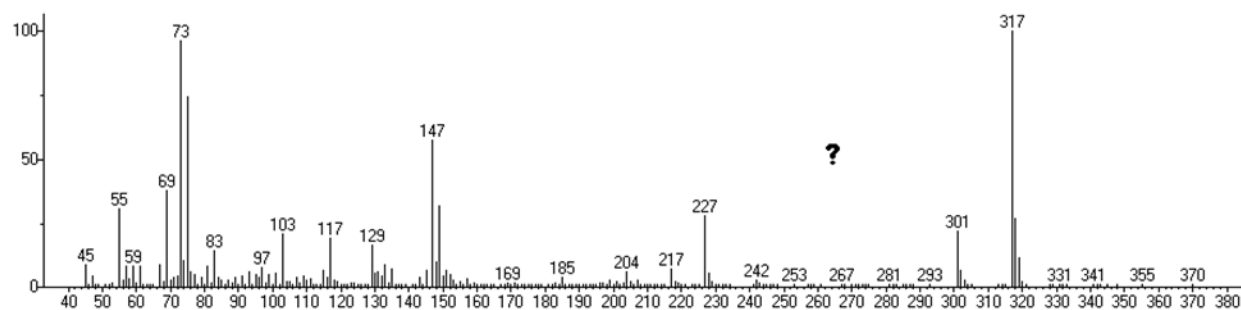

**Compound 15 (18.29min): Unk7**

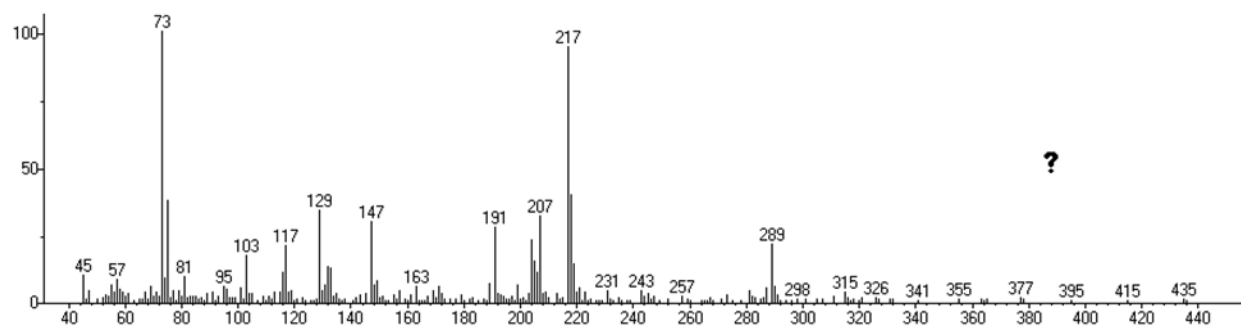

**Compound 16 (19.12min): 10HDA**

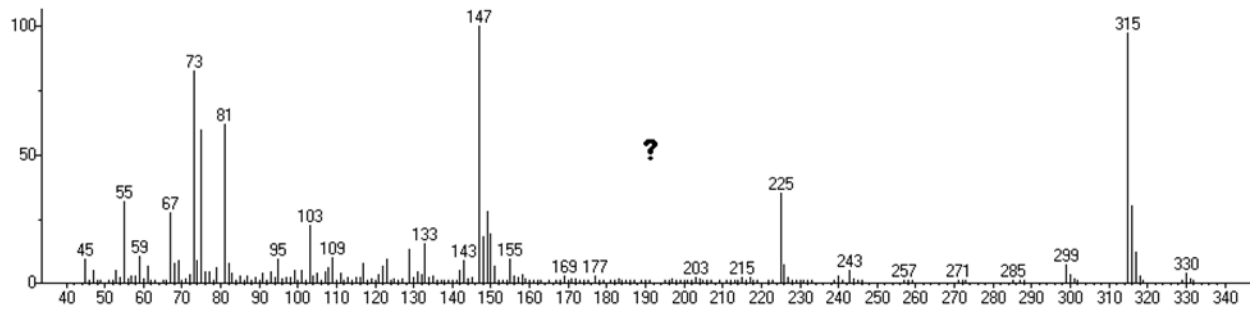

**Compound 17 (19.75min): Decanedioic acid**

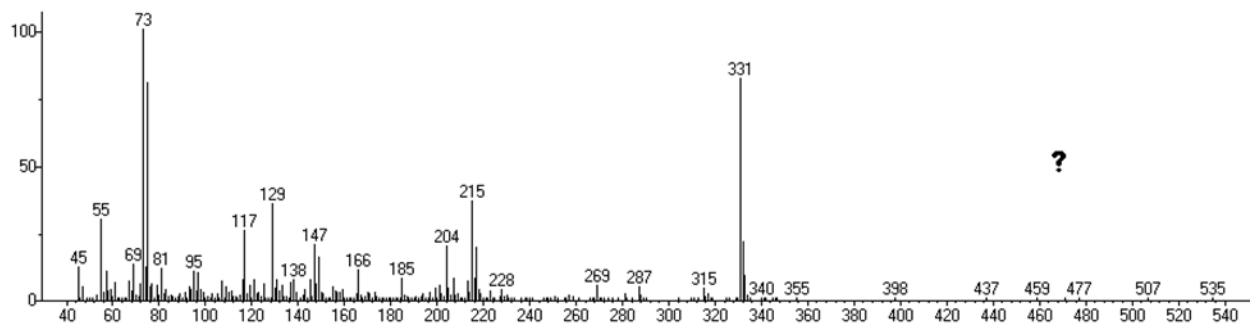

**Compound 18 (19.87min):Unk8**

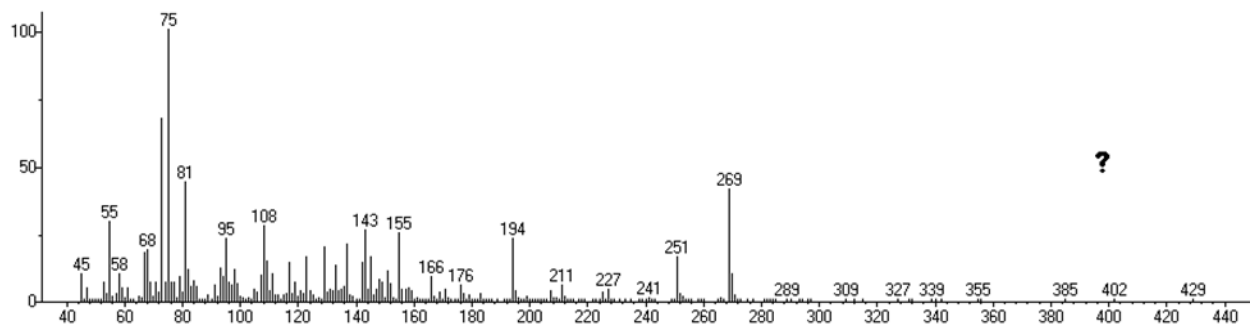

**Compound 19 (20.58min): Unk9**

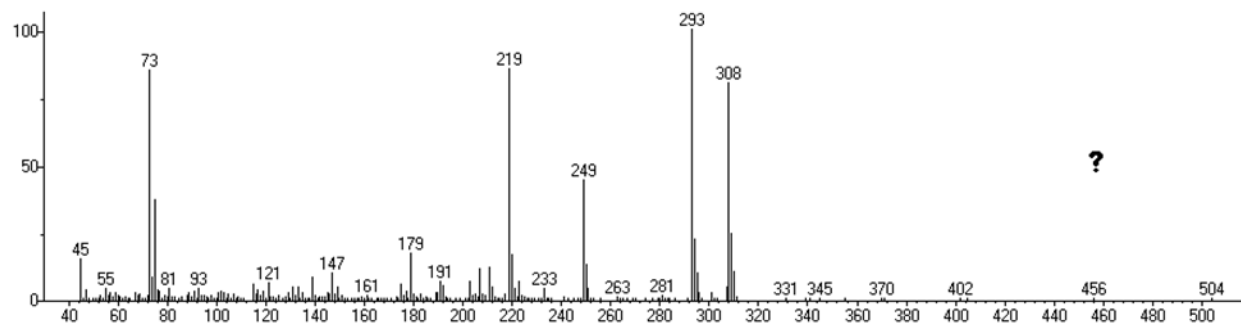

**Compound 20 (20.76min): Unk10**

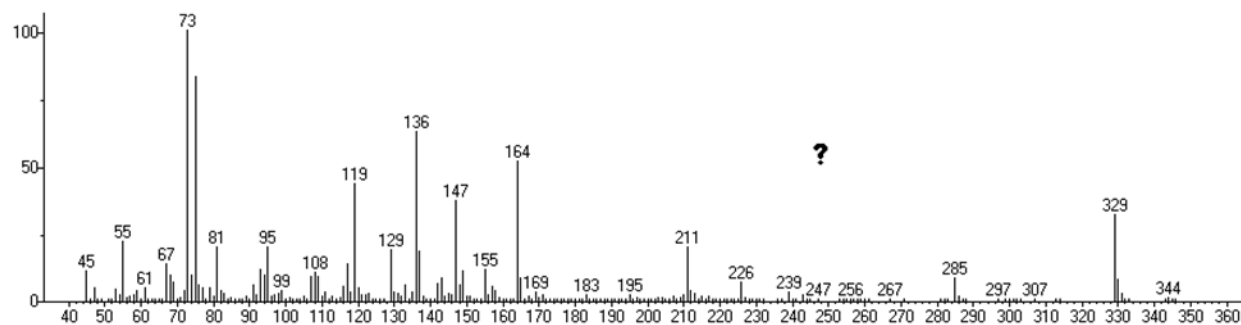

**Compound 21 (20.86min): Unk11**

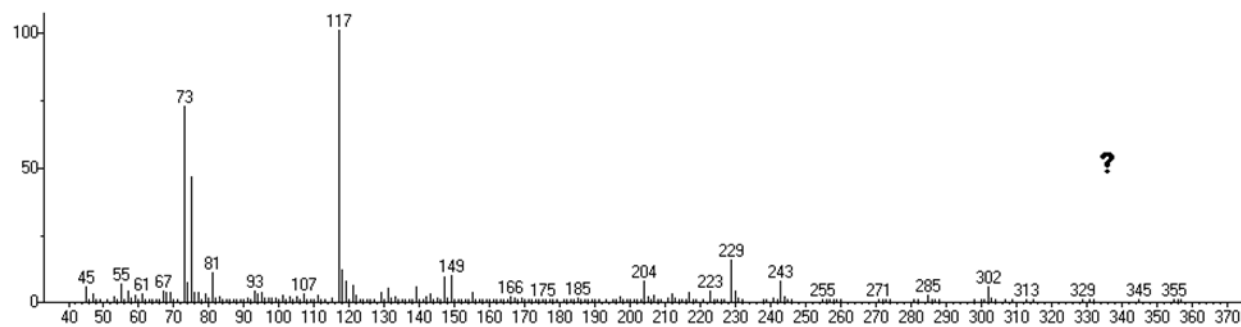

**Compound 22 (21.53min): Unk12**

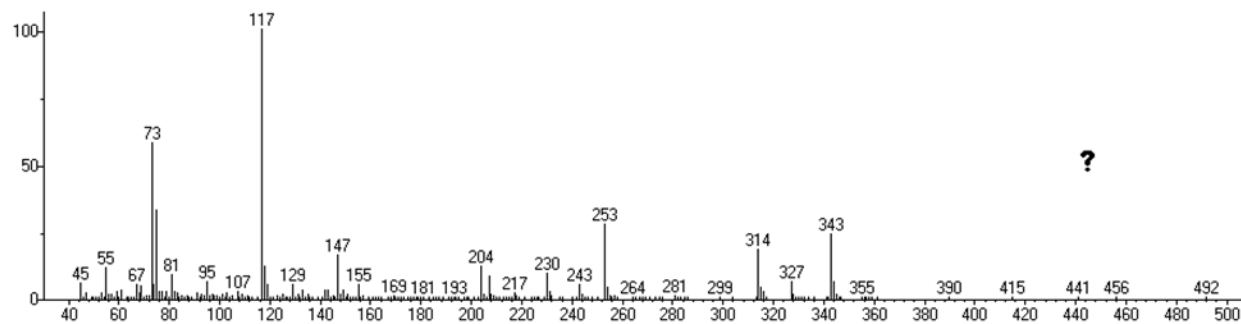

**Compound 23 (21.78min): Unk13**

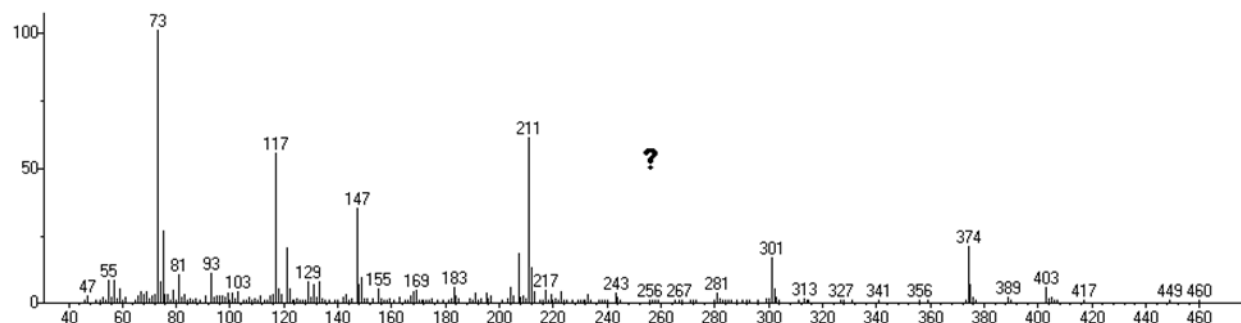

**Compound 24 (22.11min): Unk14**

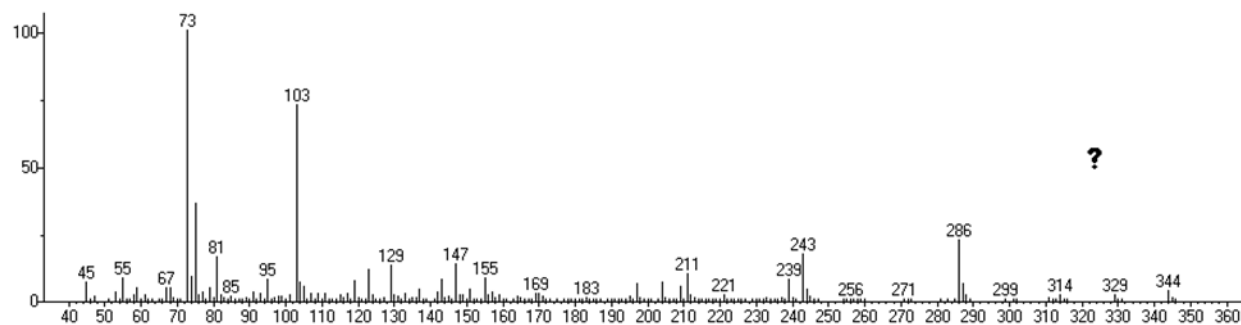



**Compound 25 (23.15min): Unk15**

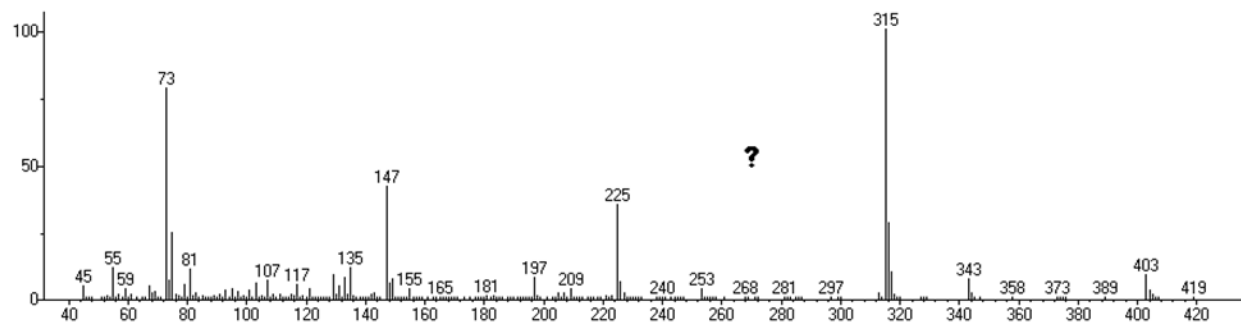

**Compound 26 (27.47min): cis-13-octadecanoic acid**

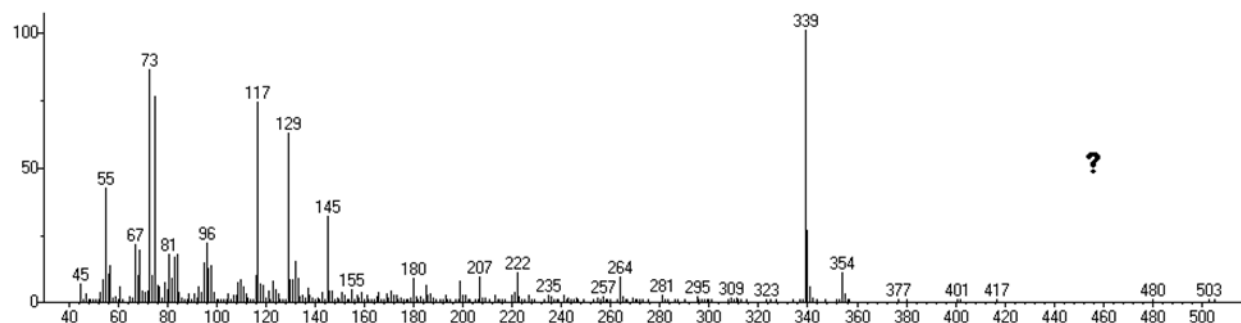

**Compound 27 (28.08min): Octadecanoic acid**

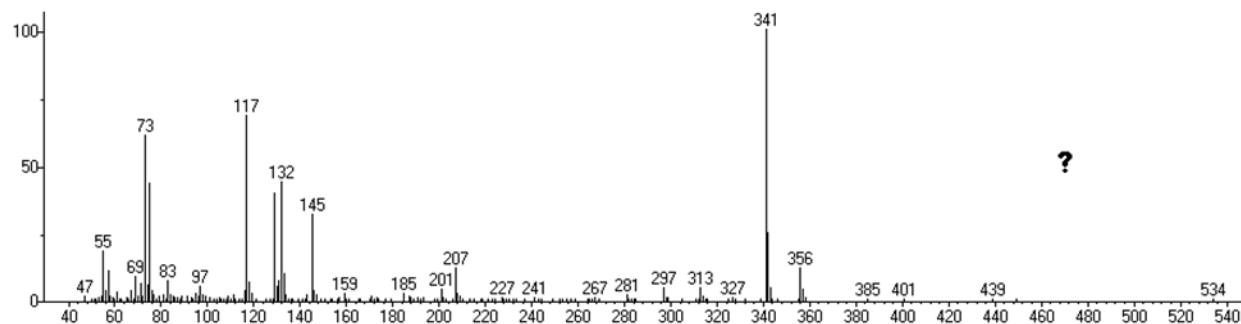

Supplement: S1 (10.1371/journal.pone.0078637.s001) [file journal.pone.0078637.s001]
