# Supplementary material for: La participación comunitaria en la construcción de una sociedad intercultural: Posibilidades de acción social en los contextos educativos
Source: PLOS journal article supplement (doi:10.1371/journal.pone.0078637), 2005-01-01

**Figure S2. Fragmentation patterns of individual compounds in experiment 2.** Shown here are the compounds recorded from the mandibular gland extracts of the queens instrumentally inseminated with low or high volume of either saline or semen (fragmentation patterns are shown for one of the SA1 queens).

**Compound 1 (12.34min): Unk1**

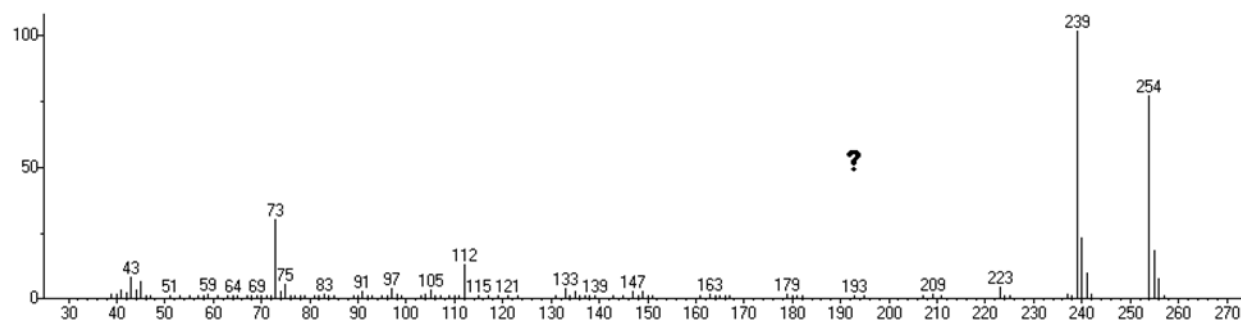

**Compound 2 (13.34min): Unk2**

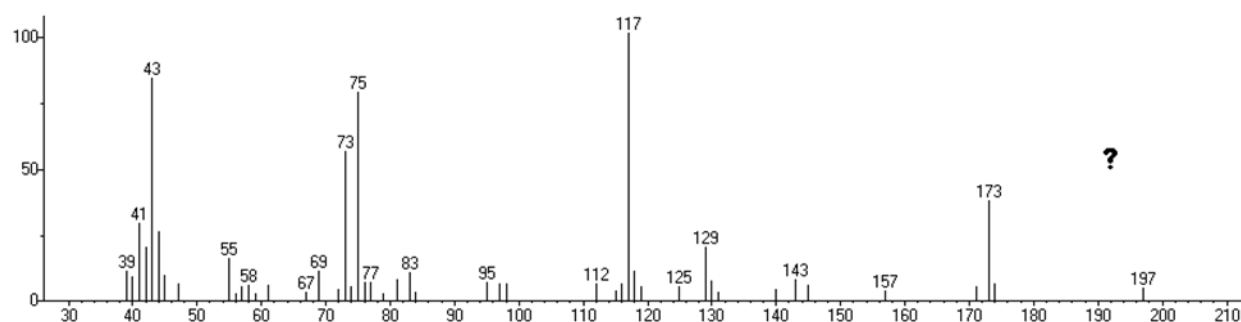

**Compound 3 (14.45min): HOB**

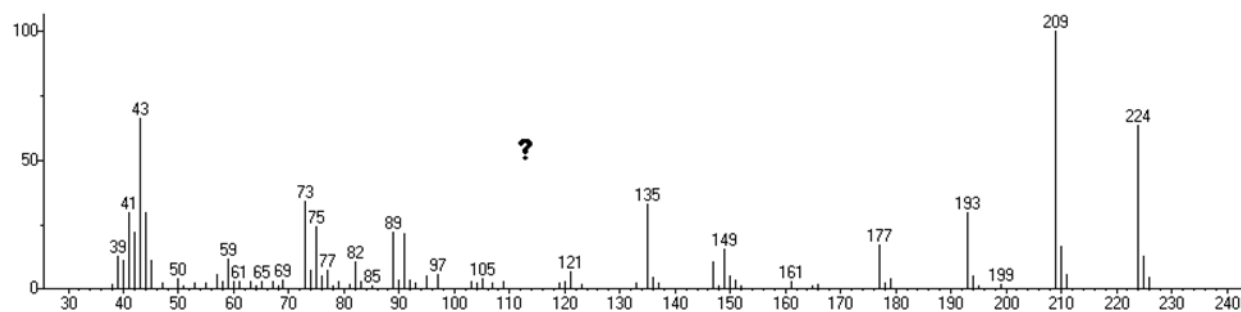

**Compound 4 (16.23min): Unk3**

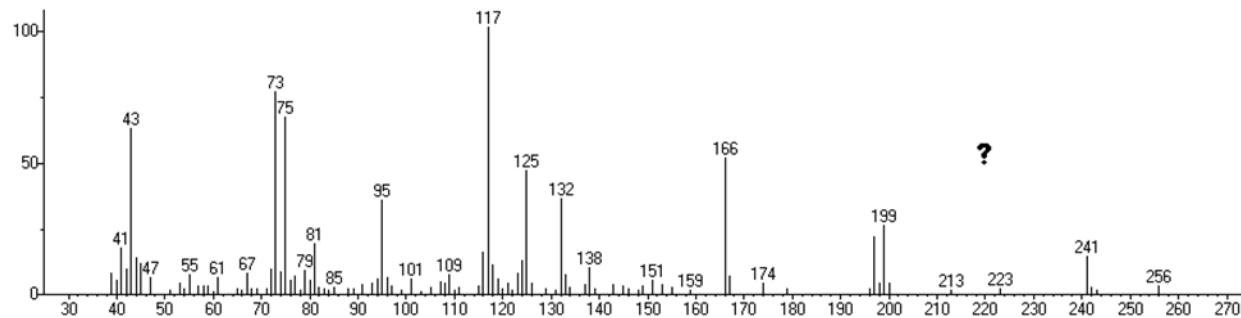

**Compound 5 (17.24min): 7OH octanoic acid**

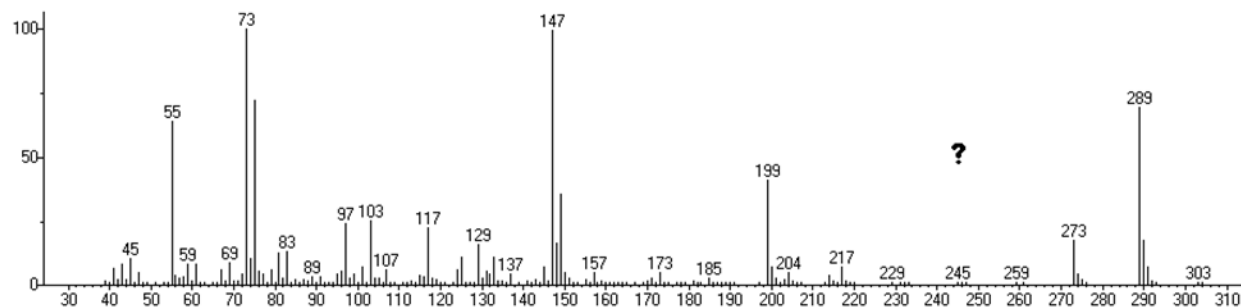

**Compound 6 (17.47min): Benzoic acid**

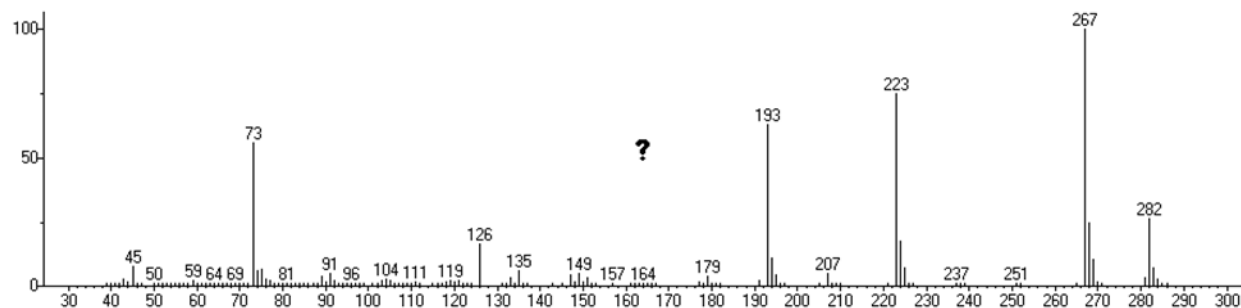

**Compound 7 (18.05min): Unk4**

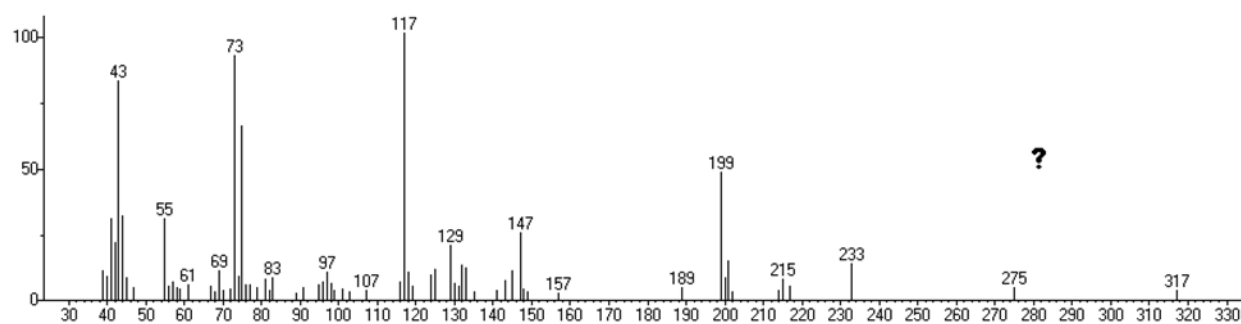

**Compound 8 (18.28min): Unk5**

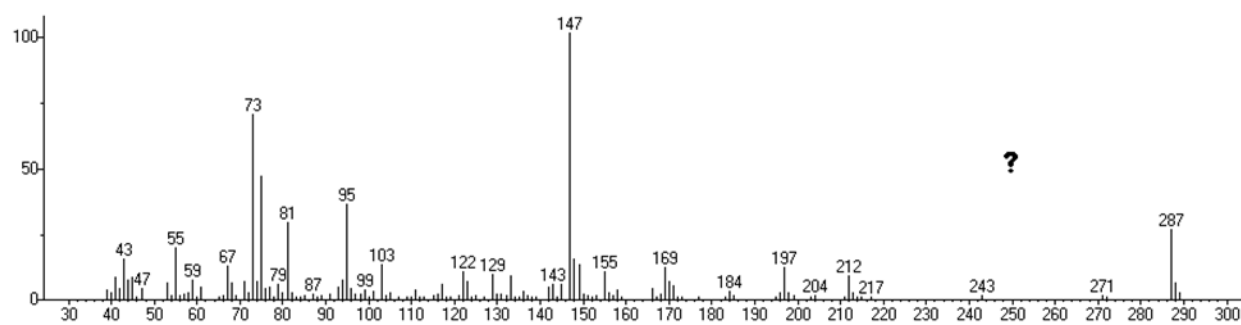

**Compound 9 (19.18min): 9-ODA**

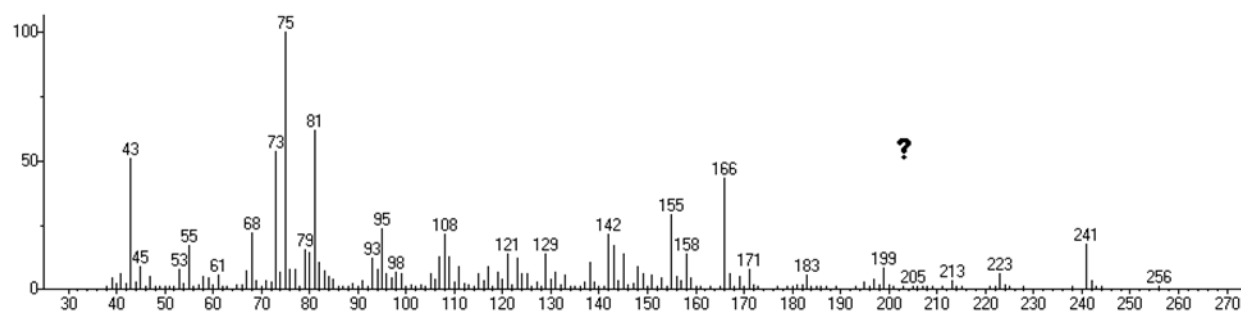

**Compound 10 (19.32min): HVA**

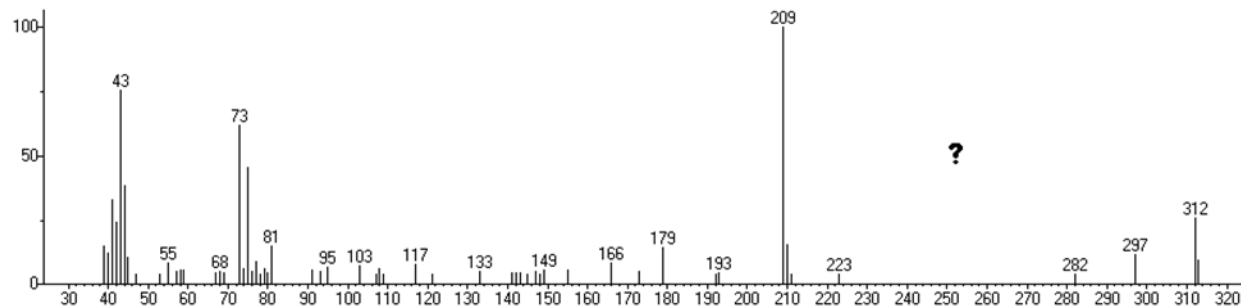

**Compound 11 (19.83min): 9-oxydecanoic acid**

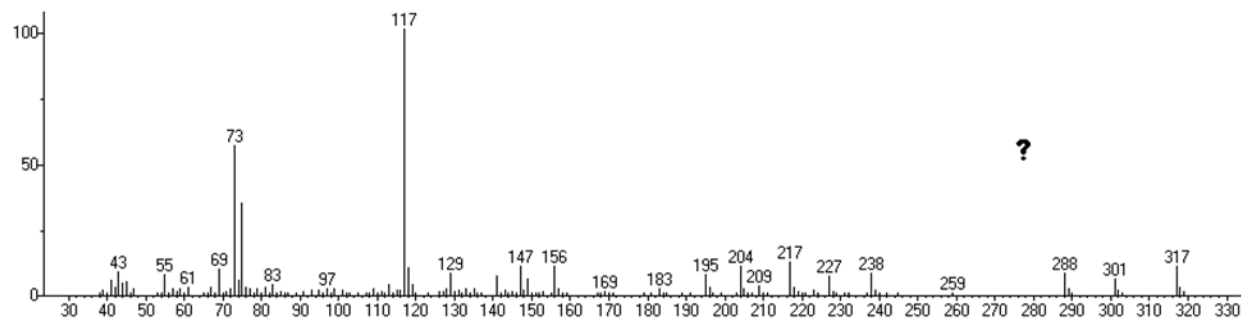

**Compound 12 (20.56min): Unk6**

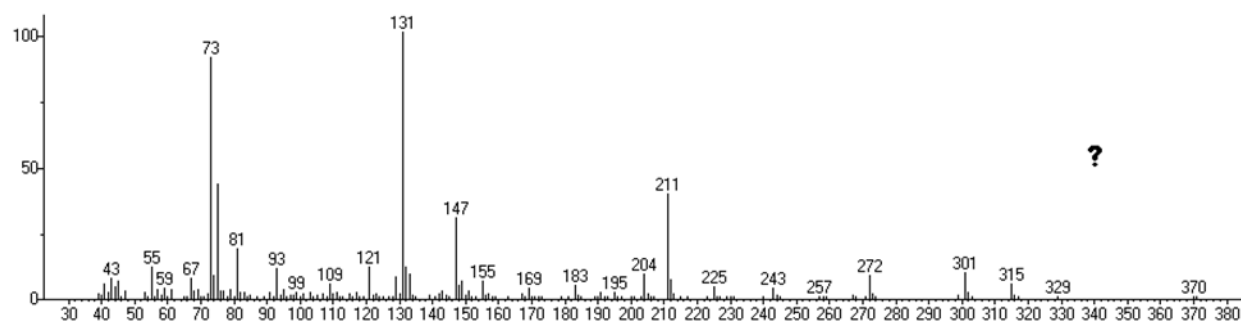

**Compound 13 (20.92min): 9-HDA**

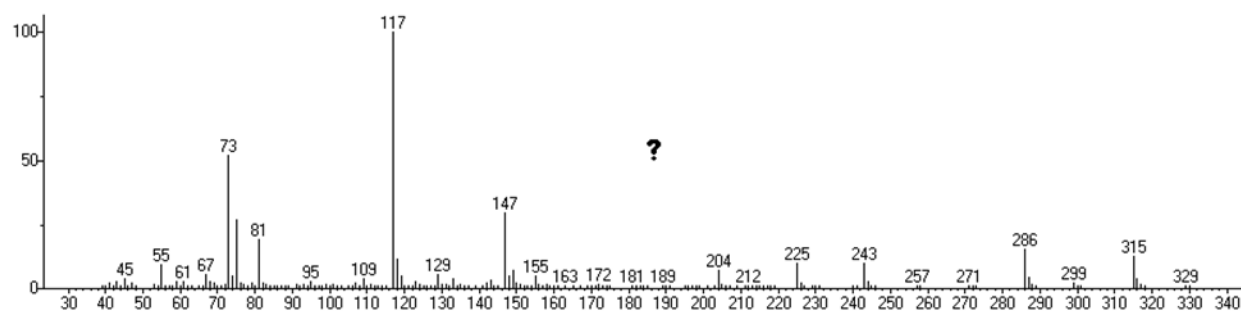

**Compound 14 (21.03min): Unk7**

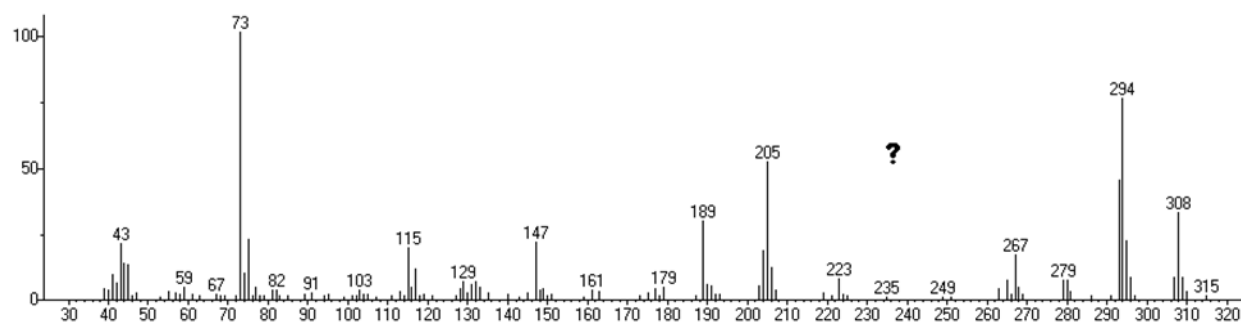

**Compound 15 (21.28min): 10HDAA**

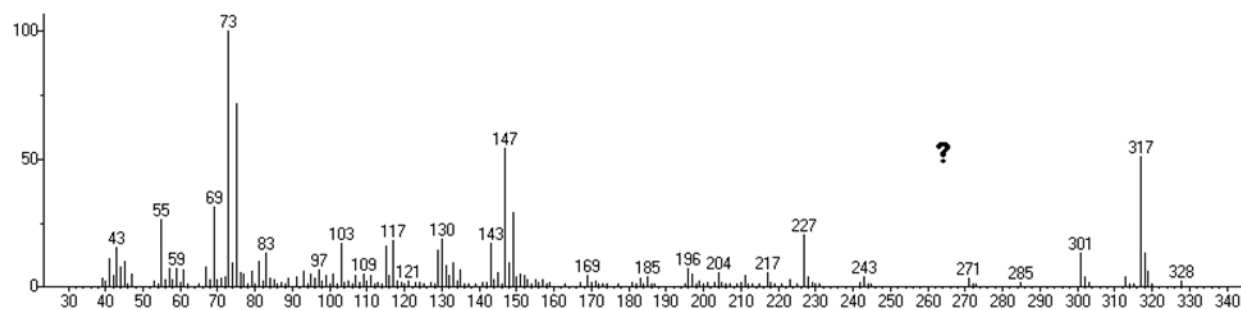

**Compound 16 (22.08min): Tetradecanoic acid**

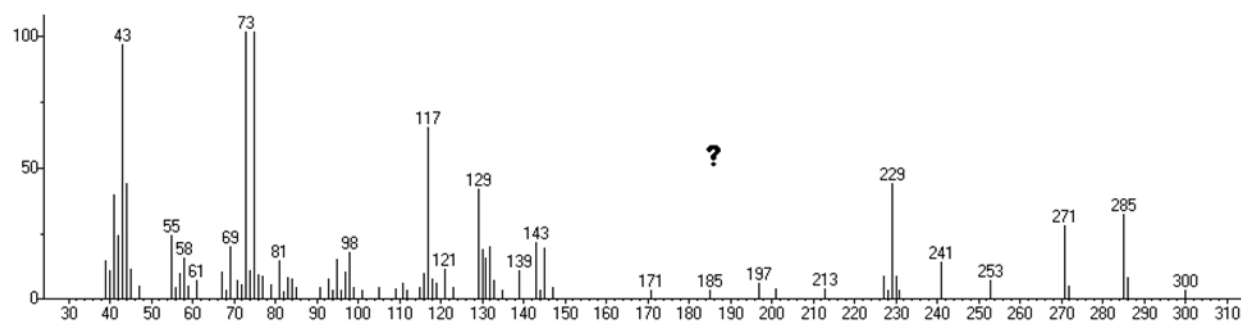

**Compound 17 (22.43min): 10HDA**

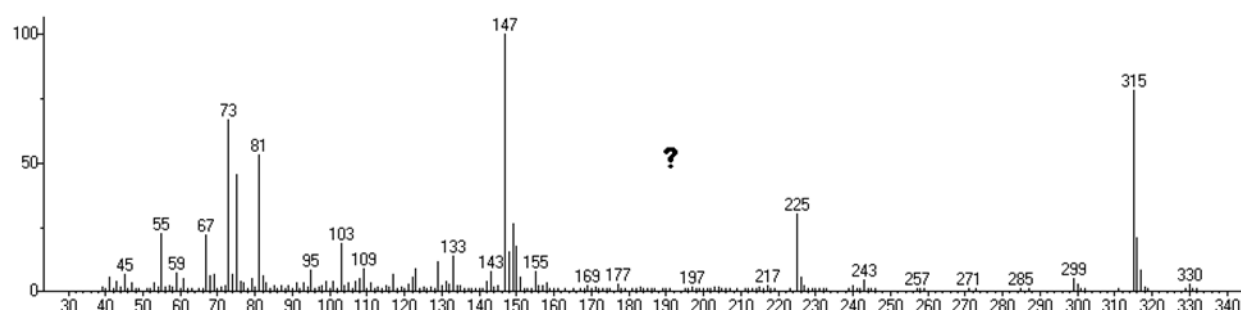

**Compound 18 (22.74min): Unk8**

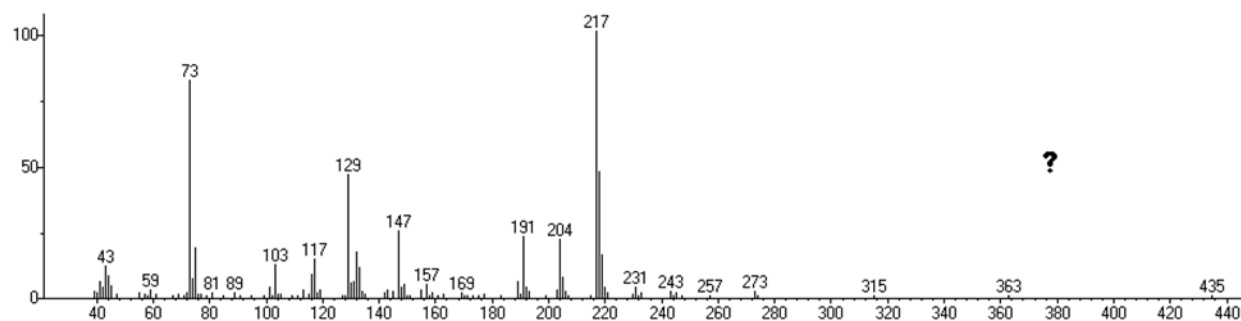

**Compound 19 (23.22min): Decanedioic acid**

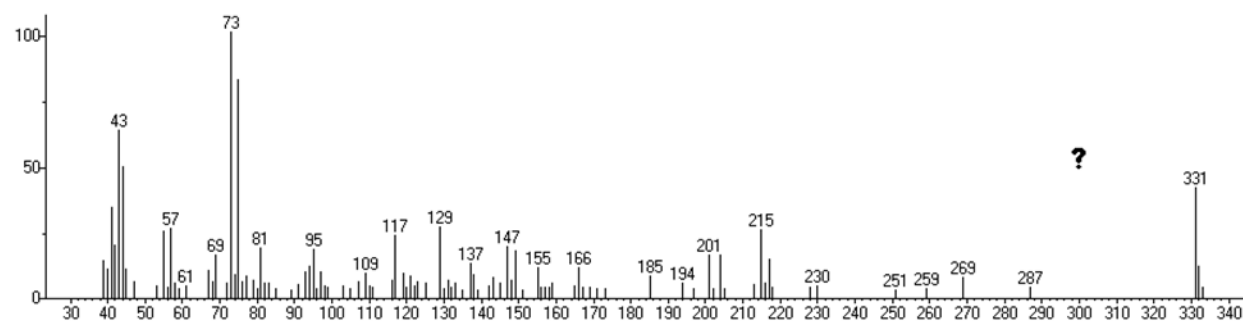

**Compound 20 (23.44min): Unk9**

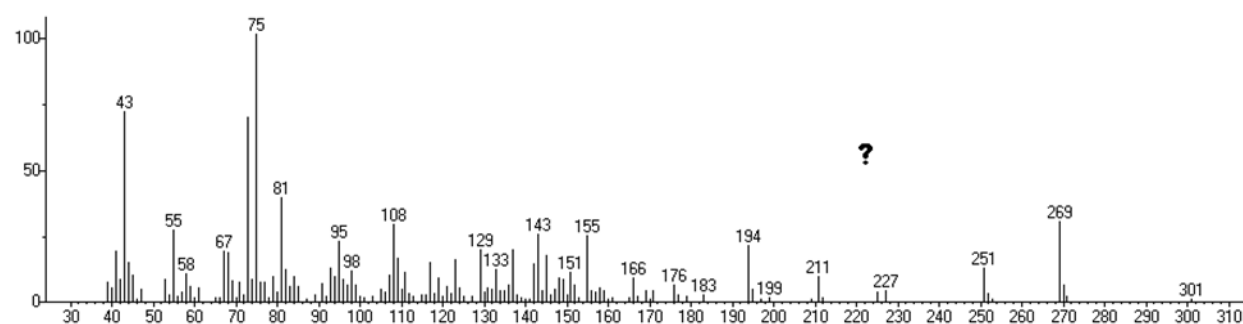

**Compound 21 (24.65min): Unk10**

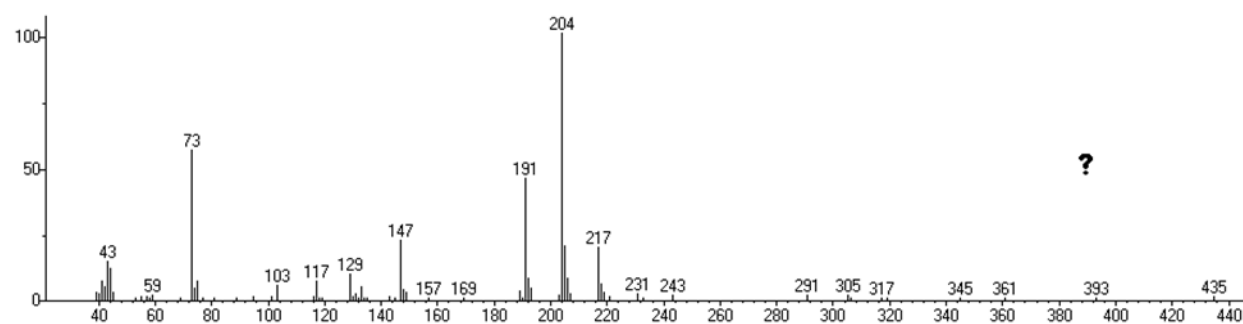

**Compound 22 (25.55min): Unk11**

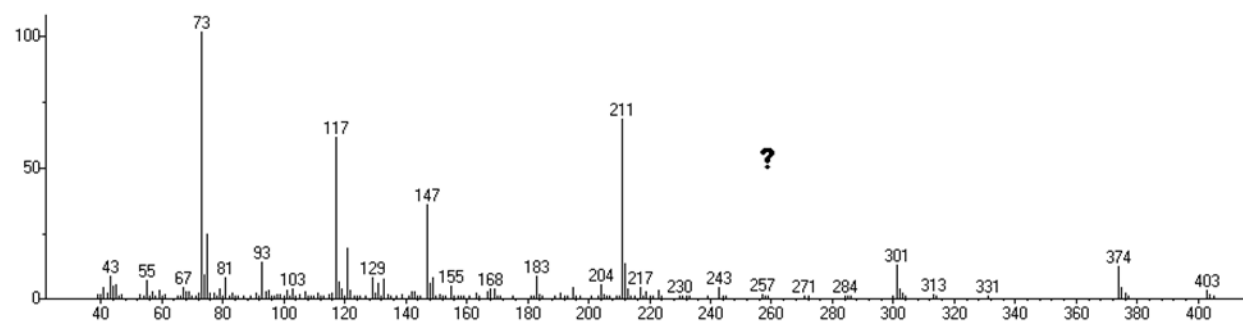

**Compound 23 (25.86min): Unk12**

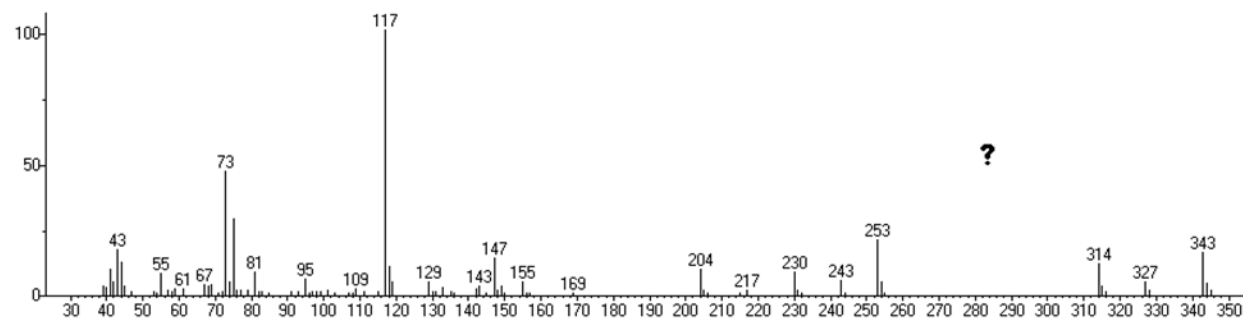

**Compound 24 (26.23min): Unk13**

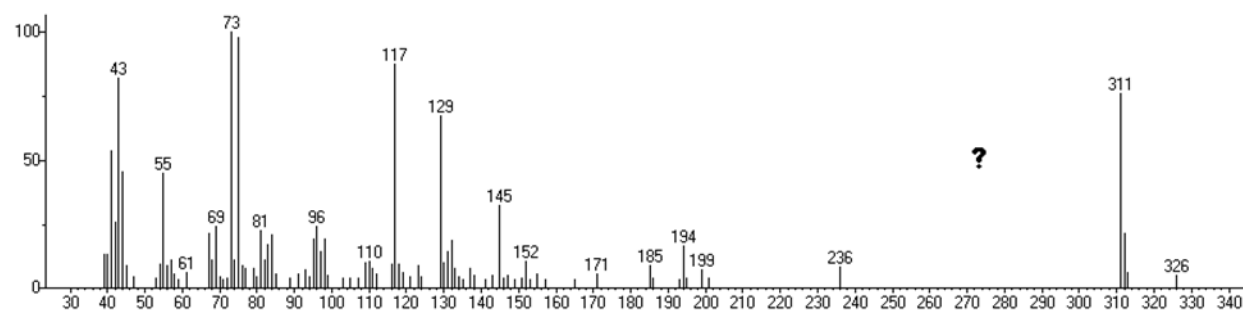



**Compound 25 (26.75min): Unk14**

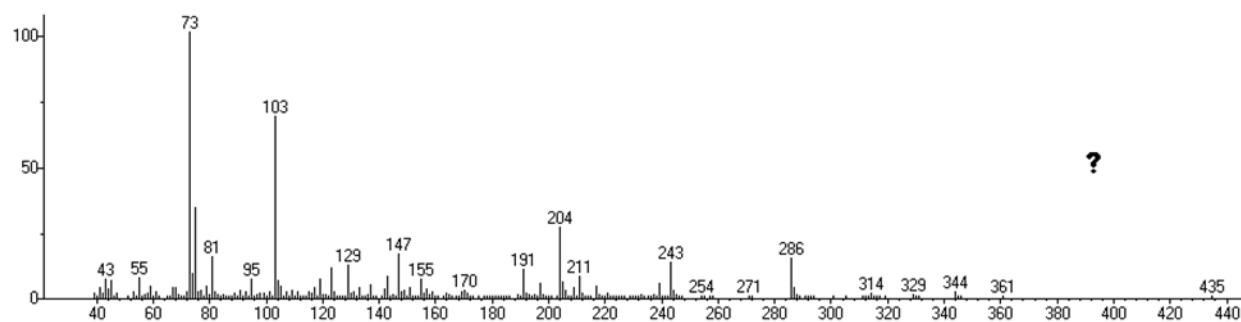

**Compound 26 (27.80min): Unk15**

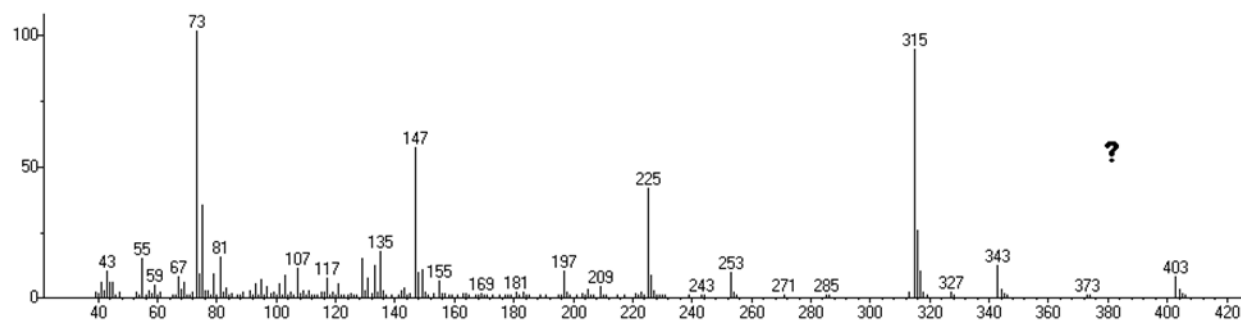

**Compound 27 (30.76min): Octadecanoic acid**

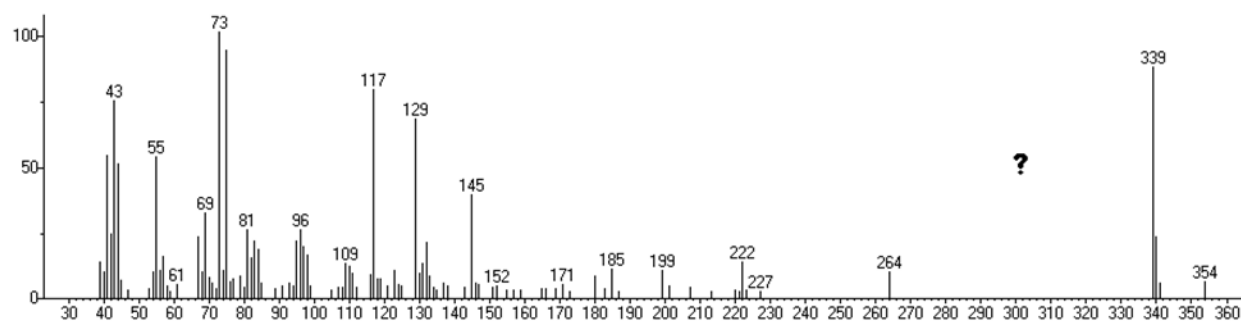

**Compound 28 (31.14min): Unk16**

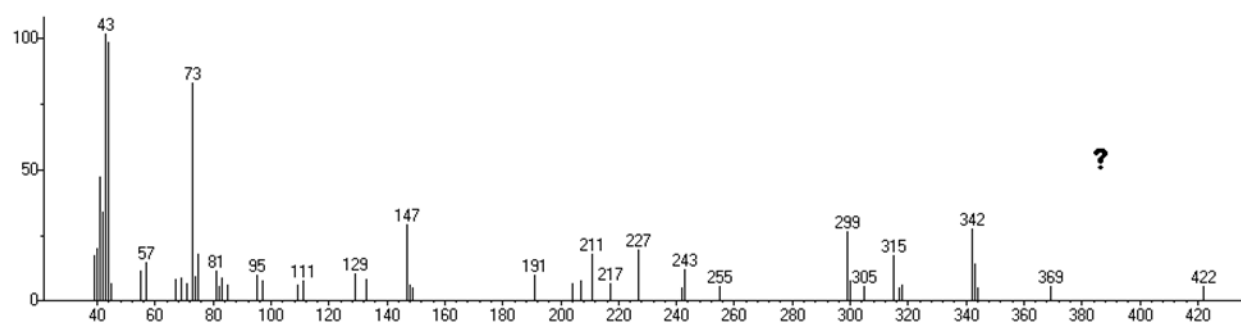

Supplement: S2 (10.1371/journal.pone.0078637.s002) [file journal.pone.0078637.s002]
