# Supplementary material for: Chemical Profiles of Two Pheromone Glands Are Differentially Regulated by Distinct Mating Factors in Honey Bee Queens (Apis mellifera L.)
Source: PLoS One. 2013 Nov 13;8(11):e78637. doi: 10.1371/journal.pone.0078637 (PMC3827242; doi:10.1371/journal.pone.0078637)
Supplement: Table S3 — Information for the ten most abundant ions (m/z and intensities) for each of the unknown compounds found in the mandibular gland extracts of the queens exposed to CO2 and CO2+ physical manipulation. (XLSX) [file pone.0078637.s005.xlsx]

## Sheet: Table S3
Table S3: Information for the ten most abundant ions (m/z and intensities) for each of the unknown compounds
found in the mandibular gland extracts of the queens exposed to CO2 and CO2+physical manipulation.
Compound	Retention Time		Peak 1	Peak 2	Peak 3	Peak 4	Peak 5	Peak 6	Peak 7	Peak 8	Peak 9	Peak 10
Unk 1	8.5	m/z	179	194	151	73	75	180	89	195	77	45
		Intensity	999	748	550	296	240	163	159	135	118	110
Unk 2	9.21	m/z	239	240	254	112	73	45	255	207	209	256
		Intensity	999	183	764	118	310	94	198	86	197	86
Unk 3	14.6	m/z	75	243	73	55	201	83	117	143	129	145
		Intensity	999	267	734	264	701	202	465	157	328	145
Unk 4	15.07	m/z	147	81	73	55	75	148	287	67	95	103
		Intensity	999	258	690	208	438	158	387	134	317	131
Unk 5	16.82	m/z	136	301	73	207	75	109	147	137	81	108
		Intensity	999	253	788	231	699	223	421	179	317	153
Unk 6	17.35	m/z	131	81	73	301	211	55	75	132	147	272
		Intensity	999	183	946	143	464	123	442	114	302	107
Unk 7	18.29	m/z	73	207	217	147	218	191	75	204	129	289
		Intensity	999	320	938	298	398	279	376	232	341	213
Unk 8	19.87	m/z	75	108	73	143	81	155	269	194	55	95
		Intensity	999	277	670	262	436	253	411	232	292	229
Unk 9	20.58	m/z	293	75	219	309	73	294	308	179	249	220
		Intensity	999	372	852	245	845	223	802	171	442	169
Unk 10	20.76	m/z	73	147	75	329	136	55	164	211	119	95
		Intensity	999	369	825	317	624	218	516	202	434	200
Unk 11	20.86	m/z	117	81	73	149	75	147	229	119	118	204
		Intensity	999	106	719	95	457	93	155	75	118	75
Unk 12	21.53	m/z	117	314	73	147	75	204	253	118	343	55
		Intensity	999	184	577	163	331	122	275	121	241	114
Unk 13	21.78	m/z	73	374	211	121	117	207	147	301	75	212
		Intensity	999	204	605	201	546	181	345	164	263	127
Unk 14	22.11	m/z	73	81	103	147	75	129	286	123	243	211
		Intensity	999	164	724	135	361	131	223	118	173	101
Unk 15	23.15	m/z	315	75	73	135	147	55	225	81	316	317
		Intensity	999	245	781	116	415	114	352	110	283	103
